# Supplementary material for: A Germline-Encoded Structural Arginine Trap Underlies the Anti-DNA Reactivity of a Murine V Gene Segment
Source: MDPI journal article supplement (doi:10.3390/ijms22094541), 2021-04-26
Supplement: s1 [file s1]

# Supplementary Material

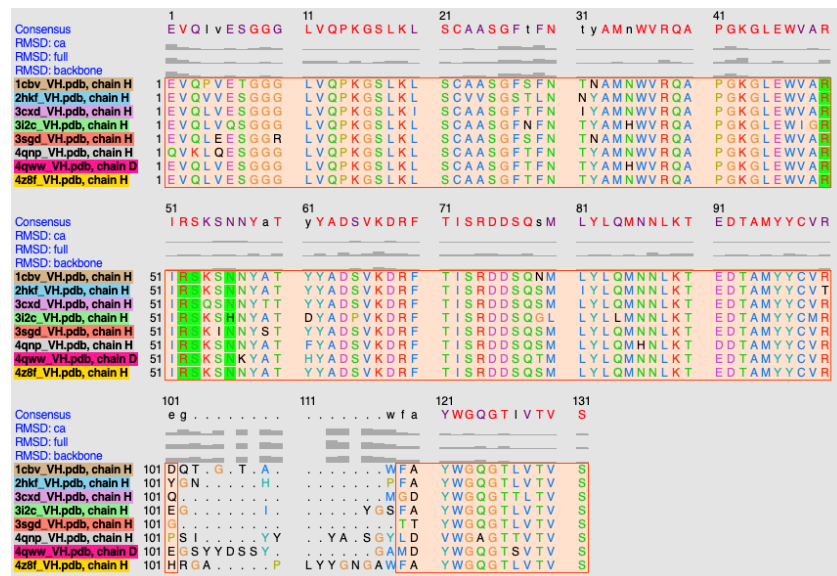

**Figure S1.** Structural alignment of eight VH10 containing PDB models. CDR2 residues that are depicted in Figure 4 is marked in green. Alignment was performed with Chimera for the V<sub>H</sub> segment (residues 1–100).

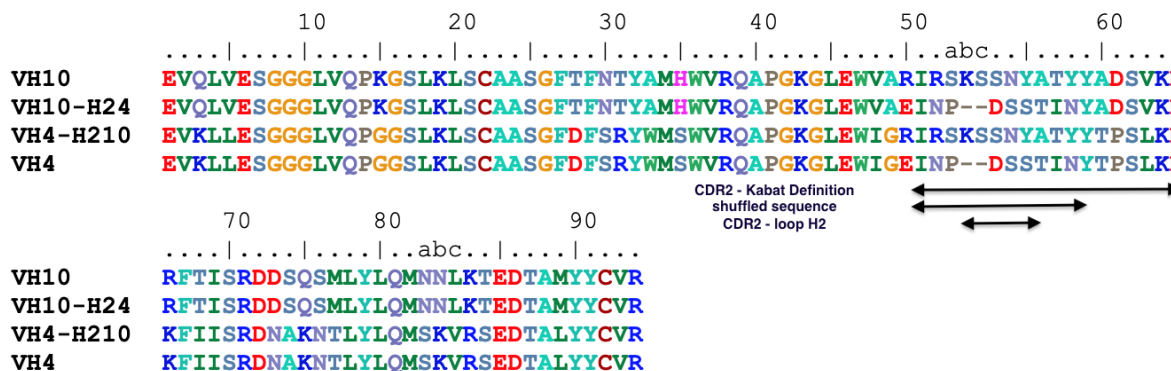

**Figure S2.** Alignment of recombinant V<sub>h</sub> gene segment produced as scpre-BCR. VH10, VH4 and the two CDR2 shuffled variants. VH10-H24 correspond to the VH10 germline containing the CDR2 loop region of VH4 germline. VH4-H210 correspond to the VH4 germline containing the CDR2 loop region of VH10 germline. CDR2 Kabat definition, shuffled region and H2 loop is marked with double headed arrows.

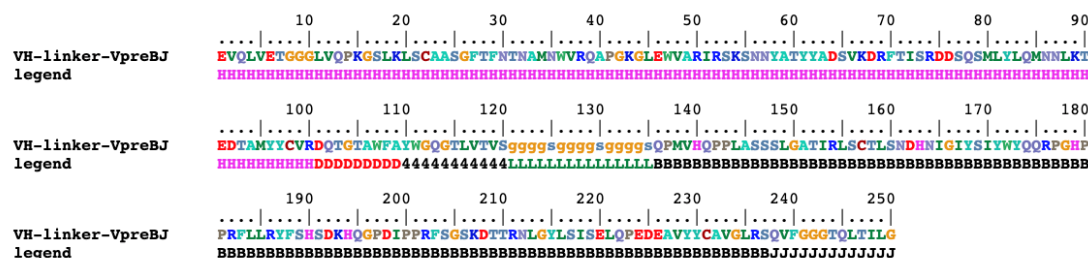

H – Germline heavy chain (V<sub>H</sub>10)  
D – Synthetic D segment  
4 – J<sub>H</sub>4 gene segment  
L – linker sequence  
B- VpreB  
J – λ5 J-like FW4

**Figure S3.** Scheme of scpre-BCR recombinant protein.

**Table 1.** WdV contacts and H-Bonds in model scpre-BCR-VH10. The number of times a residue makes contacts or bonds among the best 10 models is tabulated. Residues <5.0 Å apart are considered counted as WdV contact residues. H Bonds and distances are calculated with Chimera.

| Residue | Contact | H-Bond | Location |
|---------|---------|--------|----------|
| T31     | 10      | 0      | CDR1     |
| A33     | 10      | 0      |          |
| R50     | 10      | 4      | CDR2     |
| R52     | 10      | 5      |          |
| S52c    | 10      | 6      |          |
| S53     | 3       | 0      |          |
| E95     | 8       | 0      | CDR3     |
| Q98     | 1       | 0      |          |
| R100    | 3       | 0      |          |
| R237    | 1       | 0      | VpreB    |
